# Supplementary material
Source: publisher site journal article supplement (https://www.dovepress.com/article/310720)
Supplement: Supplementary file 1 [file get_supplementary_file.php]

**Cytotoxic potential, metabolic profiling and nanoparticles of *Coscinoderma* *sp.,* crude extract supported by *in silico* analysis**

**Supplementary Materials and Methods**

**Preparation of the crude extract**

Sponge material was cut into small pieces, and then subjected to ultrasonic-assisted extraction with methanol–methylene-chloride-(1:1) (3 × 500 mL). The resulted liquid extract was concentrated using a rotary evaporator (IKA®, Staufen, Germany). The obtained concentrated extract was suspended in distilled water and fractionated with *n*-hexane (4 × 200 mL), ethyl acetate (3 × 200 mL), and *n*-butanol (3 × 200 mL). All fractions were separately concentrated under reduced pressure and screened for their antibacterial activities. We repeated this extraction using three different samples from the same sponge, and the resultant three extracts were assayed against the cancer cell lines and were subjected to LC-HRESIMS chemical profiling. After ensuring that the biological activity and chemical makeup of the three extracts were almost the same. We pooled them together and they were used for producing the nanomaterial.

***Chemicals and reagents***

Solvents employed in-this-work-as ethanol (EtOH), petroleum ether, ethyl acetate, and *n*-butanol, were-purchased-from-El-Nasr-Company-for-Pharmaceuticals-and-Chemicals,-Egypt, which had been distilled-before work. For-the-biological-research, doxorubicin-was accepted as-a-positive-control and was acquired from-Merck-Company,-Sigma-Aldrich,-Germany, while HEPG2, MCF7, and CACO2 cancer-cell-lines-were purchased from the-American-Type-Culture-Collection (ATCC,-Rockville,-MD;-HPACC,-Salisbury,-the UK) and generally-sub-cultured twice per week. All-other-chemicals-and-reagents-were acquired from Sigma-Aldrich (Germany). While Lipoid S75 (70%-phosphatidylcholine-containing-soybean-phospholipids) was acquired from lipoid-company (Germany). Cholesterol-was acquired from Fluka-chemical-co. (India).

Extraction procedure

***Metabolomic Analysis Procedure***

Freeze-dried sponge material (8g) was-extracted-with-methanol–methylene-chloride-(1:1). The crude-extract,-developed-at-1mg/ml-for-mass-spectrometry-analysis. The-recovered-ethanolic- extract was exposed to metabolic analysis using LC-HRESIMS according-to-Abdelmohsen et al. 20141.An-Acquity-Ultra-Performance-Liquid-Chromatography-system attached to a-Synapt-G2-HDMS-quadrupole-time-of-flight hybrid mass spectrometer (Waters,-Milford,-the USA) was utilized. Positive and negative ESI-ionization-modes-were-employed-to-get-out-the-high-resolution-mass-spectrometry connected with a-spray-voltage-at-4.5-kV, the-capillary temperature-at-320°C, and mass-range-from-*m/z*-150–1500. The MS-dataset-was-processed-and-data-were obtained utilizing MZmine-2.20-based-on the accepted parameters2. Mass-ion-peaks were identified and-accompanied-by-chromatogram-builder-and-chromatogram-deconvolution. The local minimum search algorithm was addressed and isotopes were too analyzed via the isotopic peaks of grouper. Missing peaks were displayed using the gap-filling peak finder. An adduct-search-along-with-a complex-search-was carried out. The-processed-data-set was later exposed to-molecular-formula-prediction-and-peak-identification. The positive and negative ionization mode data sets from the respective extract were dereplicated against-the-DNP-(Dictionary-of-Natural-Products) databases.

***Preparation of Coscinoderma sp.,-containing liposomes***

Liposomes were developed by the simple ethanol injection method3. Briefly, One hundred mg of *Coscinoderma* *sp.,* the crude extract was dissolved with 175 mg lipoid S75 and cholesterol (lipoid: cholesterol 1:1 molar ratio) in the least amount of absolute ethanol (organic phase). The organic-phase-was then injected (200µl/10 seconds) onto the surface of an aqueous phase formed of 9% sucrose solution. The stirring of the aqueous phase was continued at 1500 rpm at 50ºC for two hours until the bilayer structure of liposomes was formed. The formed liposomal suspension was sonicated for 30 min., at 25 ºC for smaller more uniform liposomes. Then it was kept at 4 ºC for 24 hours until complete annealing of the membrane.

***Characterization of Coscinoderma sp.,-containing liposomes***

Size and polydispersity index of *Coscinoderma sp.,*containing liposomes were assigned with Zetasizer-Nano-ZSP (Malvern-Instruments,-Malvern, UK). Liposomes were first diluted with de-ionized water then analyzed at 25°C for three repeated times and average values were determined4. Zeta-potential-of-the-prepared-liposomes were evaluated utilizing mastersizer (3000E-Malvern-Instruments,-UK)5.

***Transmission Electron Microscopy (TEM)***

Prepared liposomes either free or containing *Coscinoderma sp.,* were imaged using (JEM-1400,-Jeol,-Tokyo,-Japan) equipped at 80-kV. The liposomal suspension was imaged on carbon-coated-copper-grid which was-left for ten minutes at 25°C before examination6.

***Ethical Statement***

This study was developed under the guidelines of the United-Kingdom-Coordinating-Committee-on-Cancer-Research (UKCCCR) that addressed the Use-of-cell-lines-in-cancer-research.

***Cell Culture Conditions***

The-cancer-cell-lines HEPG2, MCF7, and CACO2 were kept separately in RPMI-1640 (Gibco®-by-Life-Technologies,-Grand-Island,-NY), which were enhanced with 10%-fetal-bovine-serum (Gemini-Bio-Products), 100U/ml penicillin G, 100μM/ml streptomycin,-and 2mmol/L glutamine and the-cells-were-cultured-using-DMEM (Invitrogen/Life-Technologies) enhanced with 10%-FBS (Hyclone), 10μg/ml-of-insulin (Sigma), and 1%penicillin-streptomycin.

***Antiproliferative assay***

Cell lines (breast (MCF-7), liver (HepG2), and colorectal (CACO2) cancer cell lines) were maintained in earth RPMI 1640 medium containing 10% heat-inactivated fetal bovine serum (FBS) and were grown at 37 °C and 5% CO2. Cell lines were counted and seeded on 96-well cell culture plates (2 × 104 cells/well in the case of MCF-7 and HepG2 and 6 × 104 cells/well in the case of CACO2 cells). Cells were stimulated with the indicated concentrations of each compound overnight in triplicates. Cell viability was assessed either by 3-(4,5-dimethylthiazol-2-yl)-2,5-diphenyltetrazolium bromide (MTT) assay8. To normalize cell viability values, each plate included a triplicate of untreated cells considered as 100% viability, and a triplicate of cells treated with a cytotoxic mixture (200 ng/mL TNF, 200 ng/mL CD95L, 200 ng/mL TRAIL, 5 μg/mL CHX, 1% (w/v) sodium azide 20%) considered as 0% viability. All other viability values were normalized according to the averages of these triplicates and analyzed by the Graph Pad Prism 5 software (La Jolla, CA, USA).

***In Silico Biological Activity Predictions***

PASS9 was employed for the prediction of the most possible anticancer metabolites in *Coscinoderma sp.,* and to point a probable molecular target for them. This-software was capable of to-predict->4000-types of pharmacological-and-toxicological-activities including their mechanism-of-action, with approximately-85% as-acceptable-precision, depending-on-the submitted compound-structures that were-subsequently screened-applying the-structure-activity relationship-database (SARBase). The prediction-results-were given as probability-scores (probably-active “Pa” or probably-inactive “Pi”). These-calculated probability-scores were determined by-linking the-structure and-functional groups-features in the tested-molecules that matched or-mismatched the specific activities recorded-in the software-associated-database. The higher-the Pa-values, the better-acceptable it was-for the-compound to-present the suggested pharmacological-activity on a scale of 0–1. Pa values higher-than 0.5 mean a high-experimental chance-of the suggested-pharmacological activity.

***Molecular Docking Experiments***

Molecular docking was carried out-utilizing-Autodock-Vina-software10. The crystal structures of human SHP2 and Pin-1 proteins (PDB codes: 6MDB and 3TCZ) were retrieved from-the protein-databank-website-(https://www.rcsb.org/), and later developed using-Autodock-tools software.-The binding site of the co-crystalized ligand was selected for-the-docking-experiments. Top-scoring binding-poses with-Root Mean-square-Deviation (RMSD) values-less than 2 Å were then-selected and visualized-using Pymol-software11.

***Statistical analysis***

All-*in vitro* analyzes were done in triplicate. Pooled data were given as the-mean ± standard error-of the-mean-(SEM) of at least-three independent-experiments. The differences-among various treatment-groups were determined by-ANOVA, followed by Dunnett’s-test using-PASW Statistics® version-18 (Quarry-Bay,-Hong-Kong). A difference of *p* <0.001 was considered statistically-significant compared-with a vehicle-treated-control group and-illustrated-by a *symbol. The IC50 values-were detected utilizing-a nonlinear regression-curve fitting-analysis using GraphPad-Prism-software-version-6 (La Jolla,-CA,-the USA).

**References**

1 Abdelmohsen, U. R. *et al.* Dereplication strategies for targeted isolation of new antitrypanosomal actinosporins A and B from a marine sponge associated-*Actinokineospora sp.* EG49.  *Mar. Drugs* 2014;12:1220-1244.

<https://www.mdpi.com/1660-3397/12/3/1220>

2 Elmaidomy, A. H. *et al.* Anti-inflammatory and antioxidant activities of terpene-and polyphenol-rich *Premna odorata* leaves on alcohol-inflamed female Wistar Albino rat liver. *Molecules* 2020;25:3116.

<https://www.mdpi.com/1420-3049/25/14/3116>

3 Jaafar-Maalej, C., Diab, R., Andrieu, V., Elaissari, A. and Fessi, H. Ethanol injection method for hydrophilic and lipophilic drug-loaded liposome preparation.  *J. Liposome Res.* 2010;20:228-243.

<https://www.tandfonline.com/doi/abs/10.3109/08982100903347923>

4 New, R. R. Preparation of liposomes. *Liposomes: a practical approach.*, 1990;33-104.

<https://ci.nii.ac.jp/naid/10007301958/>

5 Elsayed, M. M. *et al.* Design and characterisation of novel Sorafenib-loaded carbon nanotubes with distinct tumour-suppressive activity in hepatocellular carcinoma.  *Int. J. Nanomed.* 2019;14:8445.

<https://www.ncbi.nlm.nih.gov/pmc/articles/PMC6825507/>

6 Smith, M. C., Crist, R. M., Clogston, J. D. and McNeil, S. E. Zeta potential: a case study of cationic, anionic, and neutral liposomes. *Anal. Bioanal. Chem.* 2017;409:5779-5787.

<https://link.springer.com/article/10.1007/s00216-017-0527-z>

7 Skehan, P. *et al.* New colorimetric cytotoxicity assay for anticancer-drug screening. *J. Natl. Cancer Inst.* 1990;82:1107-1112.

<https://academic.oup.com/jnci/article-abstract/82/13/1107/970741>

8 Cheng, C.; Othman, E.M.; Stopper, H.; Edrada-Ebel, R.; Hentschel, U.; Abdelmohsen, U.R. Isolation of Petrocidin A, a New Cytotoxic Cyclic Dipeptide from the Marine Sponge-Derived Bacterium *Streptomyces* sp. SBT348. *Mar. Drugs* **2017**, *15*, 383.

9 Lagunin, A., Stepanchikova, A., Filimonov, D. and Poroikov, V. PASS: prediction of activity spectra for biologically active substances. *Bioinformatics* 2000;16:747-748.

<https://academic.oup.com/bioinformatics/article/16/8/747/190470?login=true>

10 Seeliger, D. and de Groot, B. L. Ligand docking and binding site analysis with PyMOL and Autodock/Vina. *J. Comput.-Aided Mol. Des.* 2010;24:417-422.

<https://link.springer.com/article/10.1007/s10822-010-9352-6>

11 Lill, M. A. and Danielson, M. L. Computer-aided drug design platform using PyMOL. *J. Comput.-Aided Mol. Des.* 2011;25:13-19.

<https://link.springer.com/article/10.1007/s10822-010-9395-8>
